# Supplementary material
Source: publisher figshare collection journal article supplement (https://sage.figshare.com/ndownloader/files/19146005)
Supplement: Supplementary file 1 [file 19146005]

## **Gender Inequalities in the Dental Workforce: Global Perspectives**

T. Tiwari, C.L. Randall, L. Cohen, J. Holtzmann, J. Webster-Cyriaque, S. Ajiboye, L. Schou, M. Wandera, K. Ikeda, M. Fidela de Lima Navarro, M. Feres, H. Abdellatif, E. Al-Madi, S. Tubert-Jeannin, C.H. Fox, E. Ioannidou, and R.N. D'Souza

## **Appendix**

In Pubmed, singled out, some search terms that were used (in no particular order):

- South America[MeSH Terms]
- Women[MeSH Terms]
- Woman
- Females
- Female
- Research[MeSH Terms]
- Sexism
- dentists, women[MeSH Terms]
- dentists, woman[MeSH Terms]
- Women Dentists
- Woman Dentist
- Woman Dentists
- Female Dentists
- Female Dentist
- Eastern Europe[MeSH Terms]
- Germany
- Europe
- France
- Italy
- Spain
- Dentistry[MeSH Terms]
- school dentistry[MeSH Terms]
- Dental School
- Disparities
- Disparity
- China[MeSH Terms]
- People's Republic of China
- Mainland China
- Manchuria
- Sinkiang Inner Mongolia
- Researchers
- Clinical Investigator
- Clinical Investigators
- Investigator
- Researcher
- Investigators
- Publishing
- Publish
- Authorship

- Author
- Faculty, Dental[Mesh]
- Dental Faculties
- Dental Faculty
- dental researcher
- dental researchers
- dentistry faculties
- dentistry faculty
- disparity
- disparities
- equity
- equality

Together, some of these terms were used together in the following searches:

- (((((((South America[MeSH Terms]) AND Women[MeSH Terms]) OR Woman) OR females) OR female) AND Research[MeSH Terms])) AND sexism
- (((((((dentists, women[MeSH Terms]) OR dentists, woman[MeSH Terms]) OR Women Dentists) OR Woman Dentist) OR Woman Dentists) OR Female Dentists) OR Female Dentist)) AND Eastern Europe[MeSH Terms]
- Female) OR females) OR women) OR woman)) AND (((dentistry[MeSH Terms]) OR Dentist) OR dentists)) AND ((China[MeSH Terms]) OR ("People's Republic of China" OR "Mainland China" OR "Manchuria" OR "Sinkiang Inner Mongolia"))
- (("Researchers" OR "Clinical Investigator" OR "Clinical Investigators" OR "Investigator" OR "Researcher" OR Investigators)) OR ("publishing" OR "publish") OR ("authorship" OR "author") AND ("Faculty, Dental"[Mesh] OR "Dental Faculties" OR "Dental Faculty" OR "dental researcher" OR "dental researchers" OR "dentistry faculties" OR "dentistry faculty" OR "women dentists" OR "woman dentist") AND ("disparity" OR "disparities" OR "equity" OR "equality")

**Template questionnaire sent to all key informants.**

|                              |      |        |
|------------------------------|------|--------|
| <b>Country-specific data</b> |      |        |
| Number of Dental schools     |      |        |
| Number of Academic Faculty   |      |        |
|                              | Male | Female |
| Number of Academic faculty   |      |        |
| Academic Ranks by gender     |      |        |
| Professors                   |      |        |
| Associate Professors         |      |        |
| Assistant Professor          |      |        |
| Lectures                     |      |        |
| Department heads             |      |        |
| Deans of dental schools      |      |        |
